# Supplementary material for: Adaptation of Pseudomonas aeruginosa to constant sub-inhibitory concentrations of quaternary ammonium compounds
Source: Royal Society of Chemistry journal article supplement (doi:10.1039/c9ew01056d), 2020-01-01
Supplement: c9ew01056d1.pdf [file c9ew01056d1.pdf]

## **Adaptation of *Pseudomonas aeruginosa* to constant sub-inhibitory concentrations of quaternary ammonium compounds**

**Authors:** Margaux Voumard<sup>a</sup>; Leonardo Venturelli<sup>b</sup>; Myriam Borgatta<sup>c</sup>; Antony Croxatto<sup>d</sup>; Sandor Kasas<sup>b</sup>; Giovanni Dietler<sup>b</sup>; Florian Breider<sup>e,\*</sup>; Urs von Gunten<sup>a,f,g,\*</sup>

Affiliations:

<sup>a</sup> Laboratory for Water Quality and Treatment, IIE, ENAC, Ecole Polytechnique Fédérale de Lausanne - EPFL, Switzerland

<sup>b</sup> Laboratory of Physics of Living Matter, IPHYS, SB, Ecole Polytechnique Fédérale de Lausanne - EPFL, Switzerland

<sup>c</sup> Center for Primary Care and Public Health (Unisanté), University of Lausanne, Epalinges-Lausanne, Switzerland

<sup>d</sup> Institute of Microbiology, Lausanne University Hospital and Lausanne University, Switzerland

<sup>e</sup> Central Environmental Laboratory, IIE, ENAC, Ecole Polytechnique Fédérale de Lausanne - EPFL, Switzerland

<sup>f</sup> Eawag, Swiss Federal Institute of Aquatic Science and Technology – Dübendorf, Switzerland

<sup>g</sup> Institute of Biogeochemistry and Pollutant Dynamics, ETH Zurich, 8092 Zürich, Switzerland

\* Corresponding authors: [urs.vongunten@eawag.ch](mailto:urs.vongunten@eawag.ch); [florian.breider@epfl.ch](mailto:florian.breider@epfl.ch)

## **Electronic Supplementary Information**

## MIC determination – concentration used

In order to define the initial MIC (i.e the MIC of the bacterial strain prior to any exposure), two different sets of concentrations were used. The first set of concentrations used was from 0.06 to 32 mg/l and from 1 to 512 mg/l. Once the MIC for the selected was determined, the concentration interval was refined to have a more precise data.

Table S1

| CTMA – concentration interval [ $c_{\min}$ – $c_{\max}$ ] mg/l | MIC [mg/l] | BAC – concentration interval [ $c_{\min}$ – $c_{\max}$ ] mg/l | MIC [mg/l] |
|----------------------------------------------------------------|------------|---------------------------------------------------------------|------------|
| [0.06 – 32]                                                    | >32        | [0.06 – 32]                                                   | >32        |
| [1 – 512]                                                      | 128        | [1 – 512]                                                     | 128        |
| [10 – 150]                                                     | 110        | [50 – 150]                                                    | 80         |

| Deconex 53 PLUS– concentration interval [ $c_{\min}$ – $c_{\max}$ ] mg/l | MIC [mg/l] (active substance) | Incidin® PLUS – concentration interval [ $c_{\min}$ – $c_{\max}$ ] mg/l | MIC [mg/l] |
|--------------------------------------------------------------------------|-------------------------------|-------------------------------------------------------------------------|------------|
| [0.06 – 32]                                                              | 16                            | [0.06 – 32]                                                             | >32        |
| [1 – 512]                                                                | 16                            | [1 – 512]                                                               | 64         |
| [10 – 150]                                                               | 15                            | [10 – 100]                                                              | 40         |

**Table S2.** Average and standard deviations (4 data points) for the MIC before the exposure (cycle 0) during the exposure (cycles 1 to 10) to the QACs and after the stability period (QAC removed from the media for cycles 11 to 15; cycle 15)

| QAC  | Cycle (48 h) | Replicate | MIC [mg l <sup>-1</sup> ] |                    | Replicate | MIC [mg l <sup>-1</sup> ] |                    | Replicate | MIC [mg l <sup>-1</sup> ] |                    | Replicate | MIC [mg l <sup>-1</sup> ] |                    |
|------|--------------|-----------|---------------------------|--------------------|-----------|---------------------------|--------------------|-----------|---------------------------|--------------------|-----------|---------------------------|--------------------|
|      |              |           | Average                   | Standard deviation |
| CTMA | 0            | 1         | 110.0                     | 0.0                | 2         | 110.0                     | 0.0                | 3         | 110.0                     | 0.0                | Control   | 110.0                     | 0.0                |
| CTMA | 1            | 1         | 110.0                     | 0.0                | 2         | 110.0                     | 0.0                | 3         | 120.0                     | 17.3               | Control   | 111.4                     | 9.0                |
| CTMA | 2            | 1         | 133.3                     | 11.5               | 2         | 120.0                     | 0.0                | 3         | 130.0                     | 17.3               | Control   | 112.0                     | 4.5                |
| CTMA | 4            | 1         | 130.0                     | 0.0                | 2         | 130.0                     | 0.0                | 3         | 126.7                     | 15.3               | Control   | 113.3                     | 5.2                |
| CTMA | 5            | 1         | 150.0                     | 0.0                | 2         | 133.3                     | 11.5               | 3         | 123.3                     | 5.8                | Control   | 103.3                     | 11.2               |
| CTMA | 6            | 1         | 143.3                     | 15.3               | 2         | 120.0                     | 0.0                | 3         | 126.7                     | 5.8                | Control   | 111.7                     | 4.1                |
| CTMA | 7            | 1         | 146.7                     | 11.5               | 2         | 126.7                     | 11.5               | 3         | 130.0                     | 0.0                | Control   | 114.3                     | 7.9                |
| CTMA | 10           | 1         | 160.0                     | 0.0                | 2         | 140.0                     | 0.0                | 3         | 160.0                     | 0.0                | Control   | 116.4                     | 5.0                |
| CTMA | 15           | 1         | 127.5                     | 9.6                | 2         | 120.0                     | 0.0                | 3         | 120.0                     | 0.0                | Control   | 108.3                     | 7.5                |
| BAC  | 0            | 1         | 80.0                      | 0.0                | 2         | 80.0                      | 0.0                | 3         | 80.0                      | 0.0                | Control   | 80.0                      | 0.0                |
| BAC  | 1            | 1         | 120.0                     | 0.0                | 2         | 80.0                      | 0.0                | 3         | 80.0                      | 0.0                | Control   | 80.0                      | 0.0                |
| BAC  | 2            | 1         | 127.5                     | 5.0                | 2         | 120.0                     | 0.0                | 3         | 120.0                     | 0.0                | Control   | 80.0                      | 0.0                |
| BAC  | 3            | 1         | 127.5                     | 5.0                | 2         | 125.0                     | 5.8                | 3         | 117.5                     | 5.0                | Control   | 80.0                      | 0.0                |
| BAC  | 4            | 1         | 130.0                     | 0.0                | 2         | 130.0                     | 0.0                | 3         | 130.0                     | 0.0                | Control   | 77.5                      | 5.0                |
| BAC  | 5            | 1         | 125.0                     | 0.0                | 2         | 125.0                     | 0.0                | 3         | 90.0                      | 0.0                | Control   | 70.0                      | 0.0                |
| BAC  | 6            | 1         | 125.0                     | 0.0                | 2         | 125.0                     | 0.0                | 3         | 100.0                     | 0.0                | Control   | 70.0                      | 0.0                |
| BAC  | 7            | 1         | 156.3                     | 12.5               | 2         | 125.0                     | 0.0                | 3         | 90.0                      | 0.0                | Control   | 70.0                      | 0.0                |
| BAC  | 8            | 1         | 150.0                     | 0.0                | 2         | 131.3                     | 12.5               | 3         | 100.0                     | 0.0                | Control   | 70.0                      | 0.0                |
| BAC  | 9            | 1         | 150.0                     | 0.0                | 2         | 112.5                     | 14.4               | 3         | 106.3                     | 12.5               | Control   | 80.0                      | 0.0                |
| BAC  | 10           | 1         | 150.0                     | 0.0                | 2         | 150.0                     | 0.0                | 3         | 95.0                      | 5.8                | Control   | 72.5                      | 5.0                |
| BAC  | 15           | 1         | 150.0                     | 0.0                | 2         | 150.0                     | 0.0                | 3         | 90.0                      | 0.0                | Control   | 70.0                      | 0.0                |

**Table S3: Cross-resistance results for sequential exposures of *P. aeruginosa* to BAC followed by CTMA or CTMA followed by BAC.** Populations exposed to CTMA were tested against BAC and exposed to BAC were tested against CTMA to investigate cross-resistance. This table summarizes the MIC obtained for the cross-resistance experiments.

| Exposed to CTMA       |                   |                 | Exposed to BAC    |                                     |                                     | Exposed to Deconex® 53 PLUS |                   |                                     |
|-----------------------|-------------------|-----------------|-------------------|-------------------------------------|-------------------------------------|-----------------------------|-------------------|-------------------------------------|
| Cycle (48 h)          | MIC               | Cycle (48 h)    | MIC               | MIC [mg l <sup>-1</sup> ]           | MIC [mg l <sup>-1</sup> ]           | Cycle (48 h)                | MIC               | MIC [mg l <sup>-1</sup> ]           |
| <b>0</b>              | CTMA <sup>a</sup> | 0               | CTMA <sup>a</sup> | 110                                 | 110                                 | <b>0</b>                    | CTMA <sup>a</sup> | 200                                 |
|                       | BAC <sup>a</sup>  |                 | BAC <sup>a</sup>  | 80                                  | 80                                  |                             | BAC <sup>a</sup>  | 80                                  |
| <b>5</b>              | CTMA              | 5               | CTMA              | 150 <sup>b</sup> / 200 <sup>c</sup> | 130 <sup>b</sup> / 150 <sup>c</sup> | <b>5</b>                    | CTMA              | NA                                  |
|                       | BAC               |                 | BAC               | 80 <sup>b</sup> / 150 <sup>c</sup>  | 90 <sup>b</sup> / 125 <sup>c</sup>  |                             | BAC               | NA                                  |
| <b>10</b>             | CTMA              | 10              | CTMA              | 150 <sup>b</sup> / 200 <sup>c</sup> | 140 <sup>b</sup> / 160 <sup>c</sup> | <b>10</b>                   | CTMA              | 200 <sup>c</sup> / 250 <sup>b</sup> |
|                       | BAC               |                 | BAC               | 90 <sup>b</sup> / 150 <sup>c</sup>  | 90 <sup>b</sup> / 140 <sup>c</sup>  |                             | BAC               | 100 <sup>c</sup> / 140 <sup>b</sup> |
| <b>15<sup>d</sup></b> | CTMA              | 15 <sup>d</sup> | CTMA              | 150                                 | 90 <sup>b</sup> / 150 <sup>c</sup>  | <b>15<sup>d</sup></b>       | CTMA              | 200 <sup>c</sup> /250 <sup>b</sup>  |
|                       | BAC               |                 | BAC               | 80                                  | 150                                 |                             | BAC               | 100 <sup>c</sup> /160 <sup>b</sup>  |

<sup>a</sup> control without QAC, <sup>b</sup> replicate 1; <sup>c</sup> replicates 2 and 3; <sup>d</sup> MIC obtained after the stability period

**Table S4.** Average and standard deviation data of the Inhibition Zone Diameters (IZD) obtained with the disc diffusion method.

| cycle | Treatment | Amikacin<br>IZD [mm] |               | Ceftazidime<br>IZD [mm] |               | Ciprofloxacin<br>IZD [mm] |               | Gentamycin<br>IZD [mm] |               | Cefepime<br>IZD [mm] |               | Imipenem<br>IZD [mm] |               |
|-------|-----------|----------------------|---------------|-------------------------|---------------|---------------------------|---------------|------------------------|---------------|----------------------|---------------|----------------------|---------------|
|       |           | Average              | Std deviation | Average                 | Std deviation | Average                   | Std deviation | Average                | Std deviation | Average              | Std deviation | Average              | Std deviation |
| 0     | NA        | 24                   | 1             | 25                      | 0.9           | 35.1                      | 0.8           | 21                     | 2.2           | 31.2                 | 1.2           | 24.1                 | 1.1           |
| 5     | CTMA      | 26.6                 | 0.9           | 29.8                    | 1.2           | 36.9                      | 1.5           | 20.7                   | 1.1           | 35.6                 | 1.4           | 27.7                 | 0.7           |
| 10    | CTMA      | 22.8                 | 2             | 26.6                    | 1.1           | 34.8                      | 1             | 18.7                   | 2             | 32.6                 | 1             | 27.2                 | 0.8           |
| 15    | CTMA      | 24                   | 1.7           | 25.8                    | 0.8           | 33.8                      | 1.2           | 20                     | 0.9           | 30.2                 | 1.8           | 24.8                 | 1.5           |
| 5     | BAC       | 28.9                 | 2.3           | 30                      | 2.5           | 38.1                      | 2             | 24.4                   | 1.2           | 35.4                 | 1.8           | 27.8                 | 2.6           |
| 10    | BAC       | 26.6                 | 1.2           | 30.7                    | 1.9           | 37                        | 1             | 22.8                   | 0.7           | 33.2                 | 1.3           | 28                   | 1.6           |
| 15    | BAC       | 27.2                 | 0.7           | 27.3                    | 1.2           | 30.8                      | 1.5           | 23.6                   | 1.2           | 28.8                 | 2.4           | 26.6                 | 1.6           |
| 5     | Control   | 27.1                 | 2.6           | 27.9                    | 5.7           | 33.7                      | 3             | 19.9                   | 1.6           | 33.3                 | 3.6           | 26.1                 | 1             |
| 10    | Control   | 25.4                 | 2.4           | 25.8                    | 1.4           | 31.7                      | 1.6           | 21.1                   | 2.1           | 27.1                 | 1.4           | 25.2                 | 0.8           |

| cycle | Treatment | Levofloxacin<br>IZD [mm] |               | Meropenem<br>IZD [mm] |               | Minocycline<br>IZD [mm] |               | Tobramycin<br>IZD [mm] |               | Piperacillin-<br>tazobactam<br>IZD [mm] |               |
|-------|-----------|--------------------------|---------------|-----------------------|---------------|-------------------------|---------------|------------------------|---------------|-----------------------------------------|---------------|
|       |           | Average                  | Std deviation | Average               | Std deviation | Average                 | Std deviation | Average                | Std deviation | Average                                 | Std deviation |
| 0     | NA        | 26.7                     | 1.1           | 36.9                  | 1.5           | 18.4                    | 1.4           | 25.6                   | 1.1           | 30.2                                    | 1.1           |
| 5     | CTMA      | 28.6                     | 1.7           | 38.1                  | 1.9           | 20.4                    | 1.7           | 27.6                   | 1.5           | 31.2                                    | 1.2           |
| 10    | CTMA      | 27.7                     | 1             | 35                    | 1             | 13.2                    | 1.6           | 26.6                   | 1             | 27.9                                    | 2             |
| 15    | CTMA      | 26                       | 0.7           | 35.6                  | 0.9           | 15.4                    | 1.1           | 22.6                   | 1.3           | 28                                      | 1.3           |
| 5     | BAC       | 32                       | 1.1           | 35.6                  | 2             | 14                      | 1.3           | 24.3                   | 0.7           | 28.9                                    | 1.5           |
| 10    | BAC       | 30.7                     | 0.9           | 35.5                  | 1.2           | 15.8                    | 0.8           | 24.3                   | 0.8           | 27.8                                    | 1             |
| 15    | BAC       | 27                       | 1.8           | 34                    | 1.1           | 11.2                    | 2             | 23.8                   | 2.3           | 26.6                                    | 1.2           |
| 5     | Control   | 28                       | 2.3           | 35.8                  | 4.4           | 10                      | 2.1           | 24.3                   | 0.9           | 30.4                                    | 2.7           |
| 10    | Control   | 27                       | 1.1           | 33.3                  | 1             | 14.7                    | 0.7           | 23.2                   | 1             | 26.4                                    | 0.9           |
